# Supplementary material for: Culturing of female bladder bacteria reveals an interconnected urogenital microbiota
Source: PubMed Central journal article supplement (PMC5908796; doi:10.1038/s41467-018-03968-5), 2018-04-19
Supplement: 41467_2018_3968_MOESM2_ESM.pdf [file 41467_2018_3968_MOESM2_ESM.pdf]

## **Description of Additional Supplementary Files**

File Name: Supplementary Data 1

Description: List of bladder strains and metadata included in this study.
